# Supplementary material for: Molecular, kinetic and thermodynamic characterization of Mycobacterium tuberculosis orotate phosphoribosyltransferase
Source: Royal Society of Chemistry journal article supplement (doi:10.1039/c1mb05402c), 2011-11-11
Supplement: c1mb05402c_2.pdf [file c1mb05402c_2.pdf]

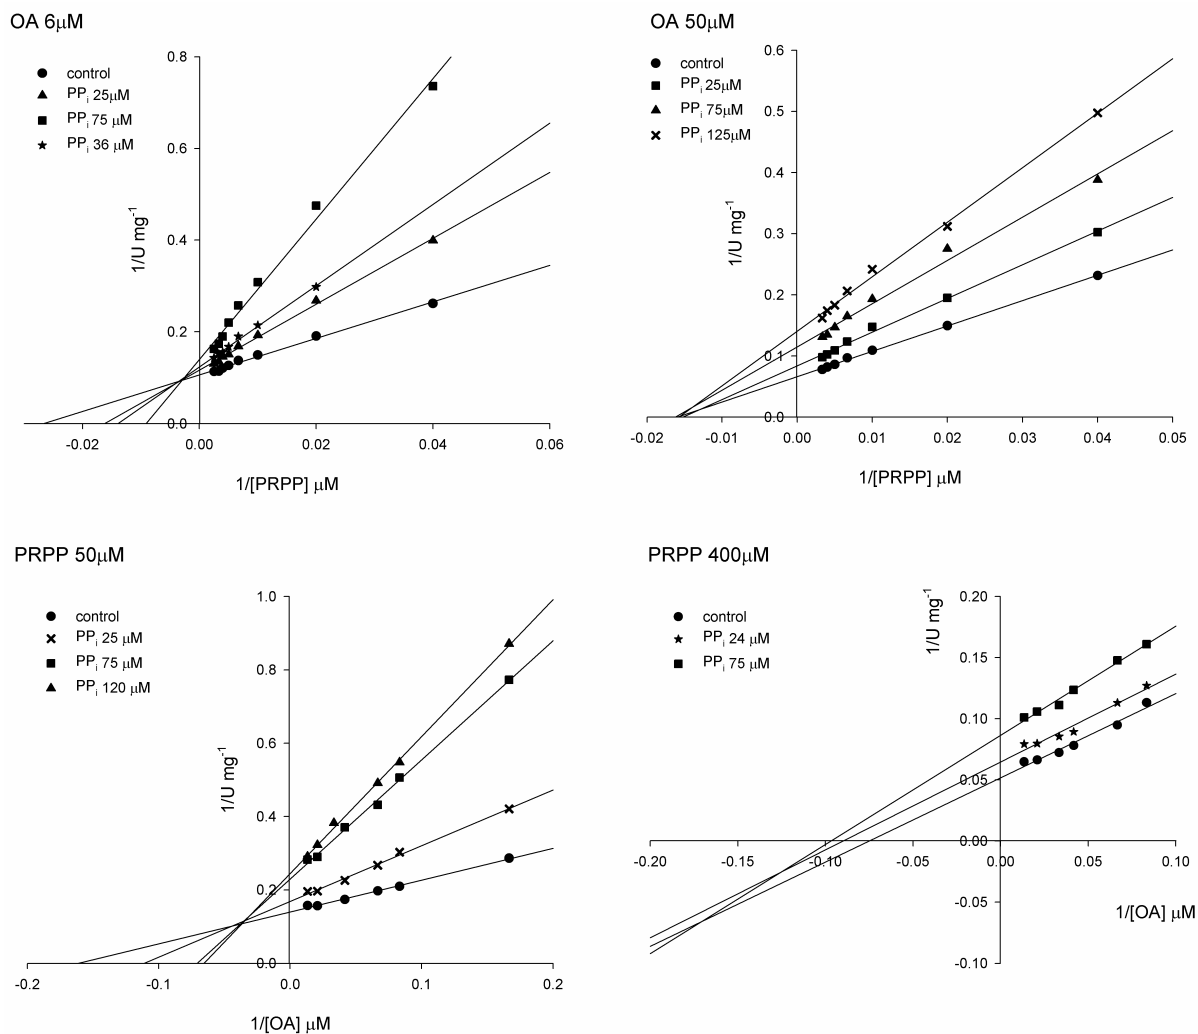

**Figure S2.** Product inhibition assays for *MtOPRT* catalyzed reaction, in presence of varied  $\text{PP}_i$  concentrations. Variation of substrate PRPP (25-400  $\mu\text{M}$ ) and product  $\text{PP}_i$  (25-125  $\mu\text{M}$ ) in the presence of saturating OA concentration (50  $\mu\text{M}$  – **upper right graph**) showed a noncompetitive inhibition pattern that changed to a mixed-type one when OA was fixed at a non-saturating concentration (6  $\mu\text{M}$  – **upper left graph**) and fixed-varied  $\text{PP}_i$  concentration range was 25-75  $\mu\text{M}$ . When OA (6-75  $\mu\text{M}$ ) and the product  $\text{PP}_i$  (25-120  $\mu\text{M}$ ) were varied in the presence of both saturating (400  $\mu\text{M}$  – **lower right graph**) and non-saturating (50  $\mu\text{M}$  – **lower left graph**) concentrations of PRPP, mixed-type inhibitions were observed.
